# Supplementary material for: Identification of Patients with Potential Atrial Fibrillation during Sinus Rhythm Using Isolated P Wave Characteristics from 12-Lead ECGs
Source: MDPI journal article supplement (doi:10.3390/jpm12101608), 2022-09-29

Supplementary Materials:

Figure S1. CNN architecture used in our study.

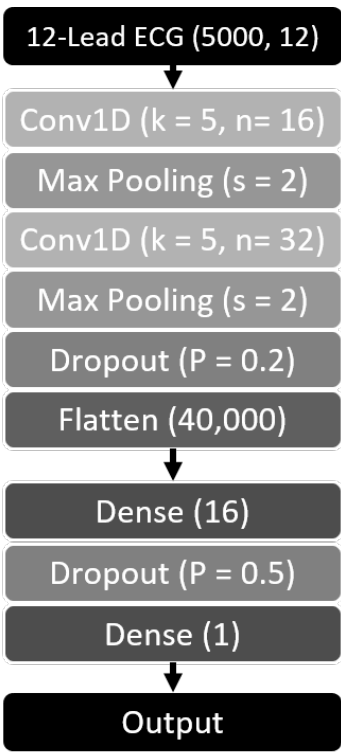

Figure S2. SHAP summary plot showing the relationship between the value of each feature and the impact on AF probability.

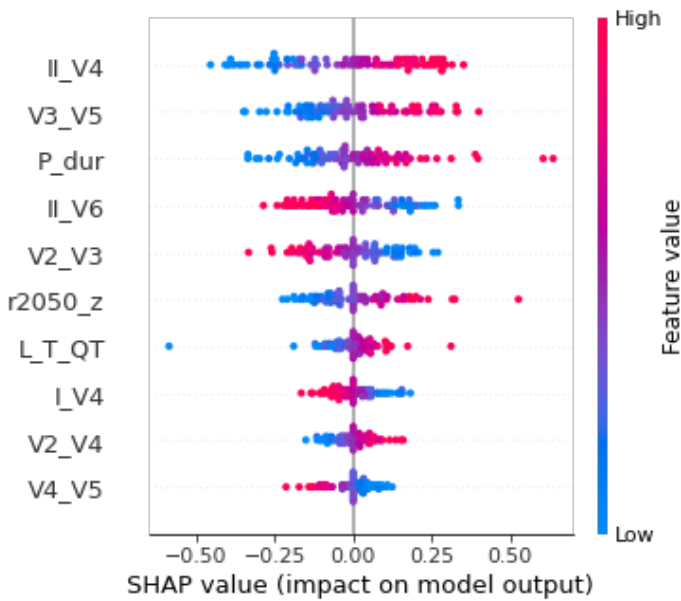

Supplement: s1 [file s1]
